# Supplementary material for: A double-blind, randomised, placebo-controlled trial of Ganoderma lucidum for the treatment of cardiovascular risk factors of metabolic syndrome
Source: PubMed Central journal article supplement (PMC4980683; doi:10.1038/srep29540), 2016-08-11
Supplement: srep29540-s1.pdf [file srep29540-s1.pdf]

## SUPPLEMENTARY MATERIALS

Manuscript Title: A double-blind, randomised, placebo-controlled trial of *Ganoderma lucidum* for the treatment of cardiovascular risk factors of metabolic syndrome

Authors: Nerida L. Klupp, Hosen Kiat, Alan Bensoussan, Genevieve Z. Steiner,  
Dennis H. Chang

| Week Withdrawn | Allocated Group                                         | Reason for Withdrawal                                                                                              |
|----------------|---------------------------------------------------------|--------------------------------------------------------------------------------------------------------------------|
| Baseline       | Placebo                                                 | General practitioner prescribed insulin to manage hyperglycaemia                                                   |
| Week 1         | <i>Ganoderma lucidum</i> with <i>Cordyceps sinensis</i> | Participant had stroke*                                                                                            |
| Week 1         | <i>Ganoderma lucidum</i> with <i>Cordyceps sinensis</i> | General practitioner prescribed insulin to manage hyperglycaemia                                                   |
| Week 1         | <i>Ganoderma lucidum</i>                                | Participant was concerned about erratic blood glucose levels and other illness priorities and changed his/her mind |
| Week 4         | Placebo                                                 | Participant required thyroidectomy after enlarged thyroid was detected during screening by trial physician         |
| Week 4         | <i>Ganoderma lucidum</i> with <i>Cordyceps sinensis</i> | Participant was concerned that high blood glucose levels might be caused by trial medication                       |
| Week 12        | Placebo                                                 | Participant was diagnosed with breast cancer*                                                                      |
| Week 12        | <i>Ganoderma lucidum</i>                                | Participant developed urinary tract infection requiring antibiotics and did not want to take so many tablets       |
| Week 16        | Placebo                                                 | Participant was not interested in final follow-up appointment                                                      |

---

\*Reported to TGA for serious adverse events.

**Supplementary Materials Table 1.** The week participants withdrew from the study (left), the intervention group that they had been randomly allocated to (middle), and their reasons for withdrawal (right).

|                                      | <i>Ganoderma lucidum</i> (n = 27) |            | Placebo (n = 30) |            | <i>Ganoderma lucidum</i> with<br><i>Cordyceps sinensis</i> (n = 27) |            |
|--------------------------------------|-----------------------------------|------------|------------------|------------|---------------------------------------------------------------------|------------|
|                                      | Week 0-16                         | Week 16-24 | Week 0-16        | Week 16-24 | Week 0-16                                                           | Week 16-24 |
| <b>Anticipated adverse events</b>    |                                   |            |                  |            |                                                                     |            |
| Headache                             | 1                                 |            | 1                |            | 2                                                                   |            |
| Fatigue                              | 6                                 | 1          | 1                |            | 1                                                                   | 3          |
| Diarrhoea                            | 6                                 |            | 4                |            | 4                                                                   |            |
| Constipation                         | 3                                 |            | 3                |            |                                                                     |            |
| Nausea                               | 4                                 | 1          | 1                |            | 4                                                                   |            |
| <b>Nonanticipated adverse events</b> |                                   |            |                  |            |                                                                     |            |
| Immune system and infection          | 9                                 | 1          | 14               | 5          | 11                                                                  | 1          |
| Skin                                 | 1                                 |            | 4                |            | 1                                                                   | 1          |
| Neurological                         | 2                                 | 1          |                  |            | 1                                                                   |            |
| Musculoskeletal                      | 6                                 |            | 4                |            |                                                                     |            |
| Liver and biliary                    |                                   |            |                  |            |                                                                     |            |
| Alimentary and pancreatic            | 5                                 |            | 5                | 1          | 3                                                                   | 1          |
| Endocrine                            | 2                                 |            | 1                |            | 3                                                                   |            |
| Respiratory                          | 5                                 | 3          | 5                |            | 3                                                                   |            |
| Cardiovascular                       |                                   | 1          | 3                |            |                                                                     |            |
| Kidney and genitourinary             |                                   |            |                  |            |                                                                     | 1          |
| Mental health                        | 2                                 |            | 2                | 2          | 2                                                                   | 3          |
| <b>Total</b>                         | <b>52</b>                         | <b>8</b>   | <b>48</b>        | <b>8</b>   | <b>35</b>                                                           | <b>10</b>  |

**Supplementary Materials Table 2.** The frequency of anticipated mild adverse events (side effects) and non-anticipated adverse events separately for the 3 intervention groups from the intervention (0-16 Weeks) and follow-up (16-24 Weeks) periods.
